# Supplementary material for: Gyejigachulbu‐Tang Relieves Oxaliplatin‐Induced Neuropathic Cold and Mechanical Hypersensitivity in Rats via the Suppression of Spinal Glial Activation
Source: Hindawi journal article supplement (doi:10.1155/2014/436482), 2014-01-01
Supplement: f1 [file 436482.f1.pdf]

## TJ-18 桂枝加朮附湯 3D HPLC Pattern

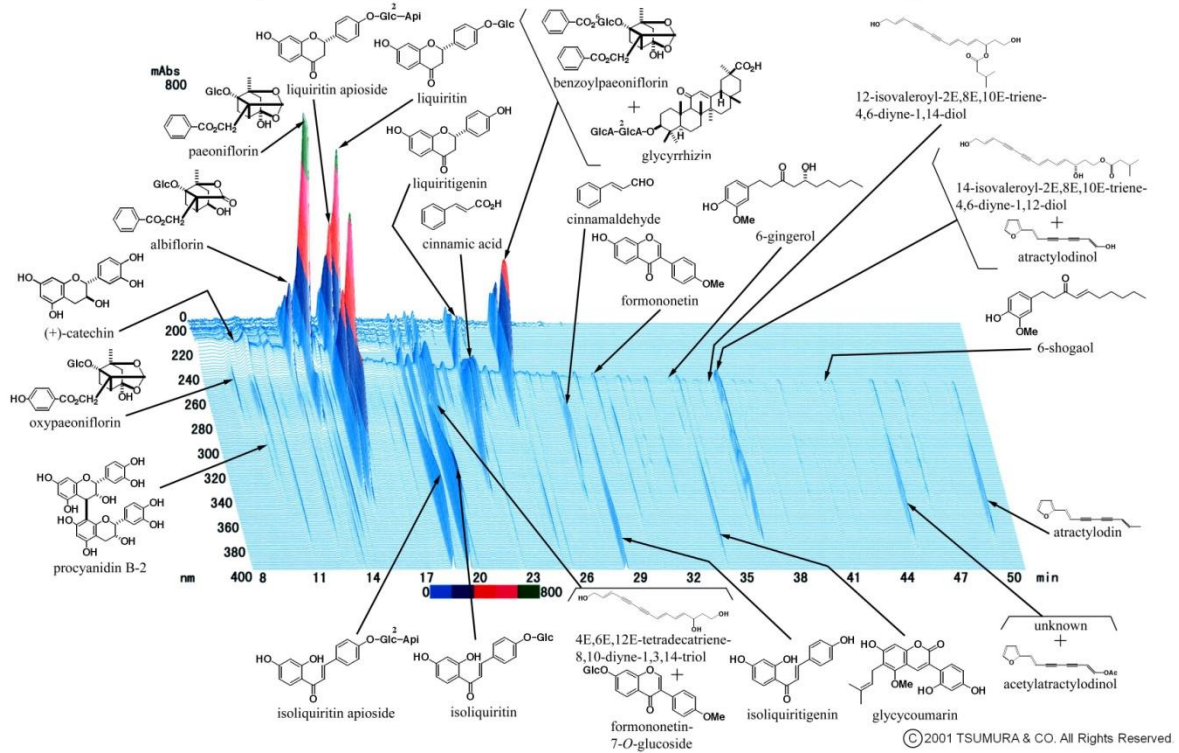

**Supplementary Figure 1. Three-dimensional HPLC profile of GBT.** This profile was provided by Tsumura & Co., Tokyo, Japan.

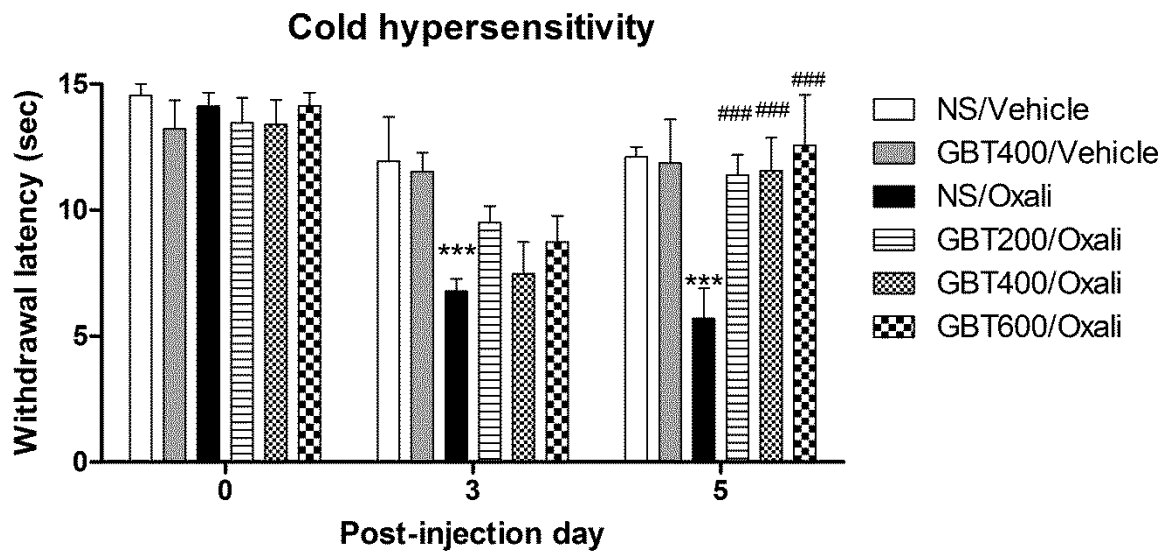

**Supplementary Figure 2. Effects of GBT on oxaliplatin-induced cold hypersensitivity that was tested before GBT administration.** The average tail withdrawal latency in response to cold stimuli prior to (left), and 3 days (middle) and 5 days (right) after an oxaliplatin (6 mg/kg, i.p.) injection. Data are presented as mean  $\pm$  S.E.M. \*\*\* $p$ <0.001 vs. NS/Vehicle; ### $p$ <0.001 vs. NS/Oxali by one-way ANOVA followed by Dunnett's post hoc test.
